# Supplementary material
Source: PubMed Central journal article supplement (PMC7164813)
Supplement: mmc1.pdf [file mmc1.pdf]

# THE LANCET

## Public Health

### **Supplementary appendix**

This appendix formed part of the original submission and has been peer reviewed. We post it as supplied by the authors.

Supplement to: Fang L-Q, Sun Y, Zhao G-P, et al. Travel-related infections in mainland China, 2014–16: an active surveillance study. *Lancet Public Health* 2018; published online July 19. [http://dx.doi.org/10.1016/S2468-2667\(18\)30127-0](http://dx.doi.org/10.1016/S2468-2667(18)30127-0).

## Supplementary appendix

Supplement to: Travel-related infections in mainland China from 2014 to 2016: an active surveillance study.

### Table of Contents

| Page | Item                                                                                              |
|------|---------------------------------------------------------------------------------------------------|
| 2    | Figure S1: The distribution of all 272 entry-exit ports in mainland China                         |
| 3    | Supplementary methods                                                                             |
| 4    | Figure S2: Informed consent form provided by each participant                                     |
| 5    | Table S1: Infections and their specific laboratory tests recommended by AQSIQ                     |
| 7    | Figure S3: The proportion of each specific infection by exposure regions in 2014–16               |
| 8    | Figure S4: Seasonal variation of travel-related infections in international and HMT travel groups |
| 9    | Table S2: Clinical manifestations of each travel-related infection                                |

**Figure S1: The distribution of all 272 entry-exit ports in mainland China**

The red, brown and purple points indicate the airports, water ports and land entry-exit stations, respectively.

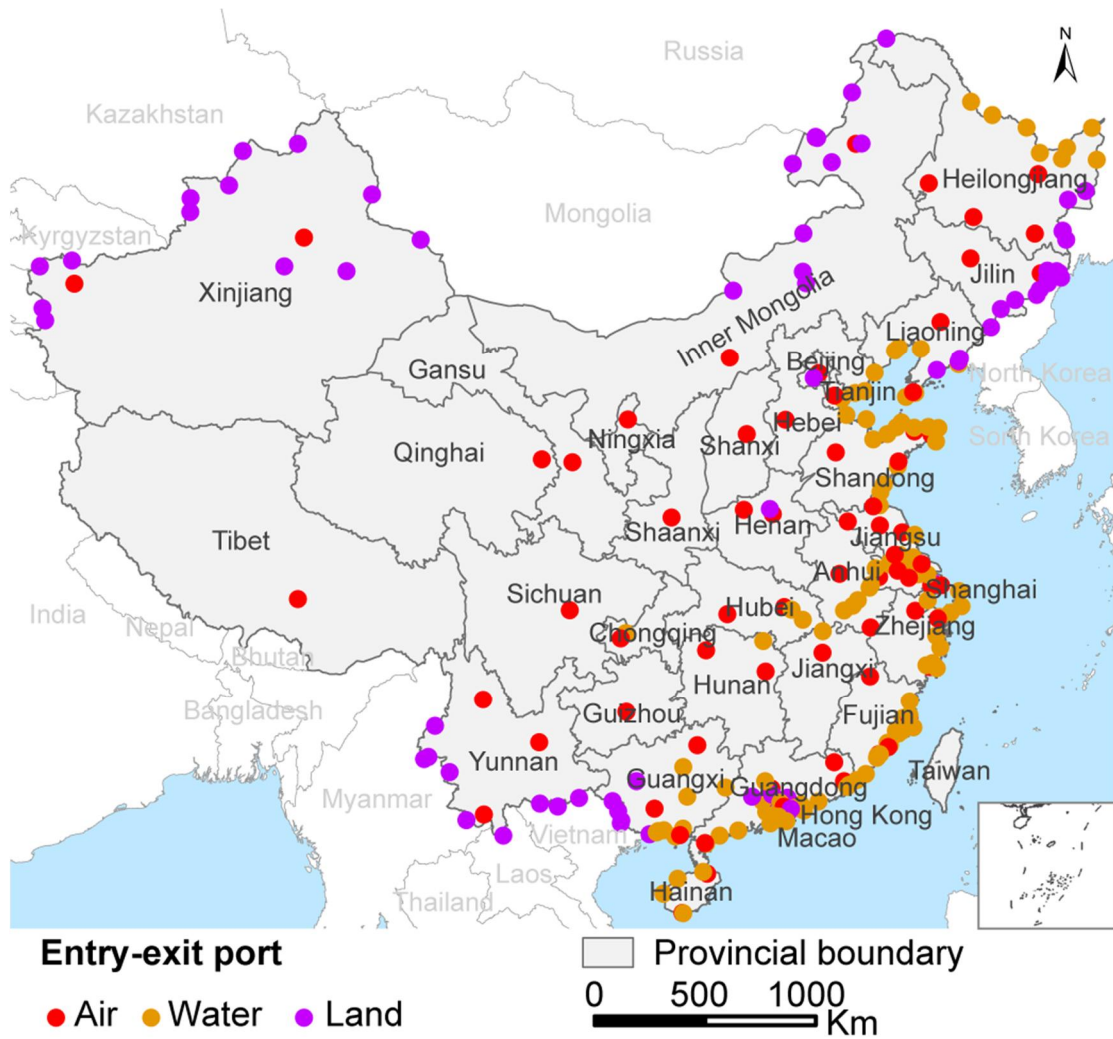

**Supplementary methods**

Case-finding approaches included fever screening, medical inspection, self-declaration, and reporting of on-board staff. Fever screening was conducted by using infrared thermometers or thermal imaging. Medical inspection was performed by a quarantine officer when passengers passed quarantine stations to look for any symptoms of a problem, such as jaundice, scars, rashes, swelling, shaking, skin discoloration, vomiting, forced posture, painful expression, etc. Passengers who came from any endemic areas and felt ill were required to report their illness to the officer at quarantine stations of entry-exit ports. The staff on-board are responsible for reporting to the officers at quarantine stations of entry-exit ports once they noticed passengers suspected for an infection during the travelling. All these suspected cases were required to be quarantined according to the International Health Regulations issued by the World Health Organization and the Frontier Health and Quarantine Law of China.

Figure S2: Informed consent form provided by each participant

JLWSC041 采样知情同意书

---

**采样知情同意书**

旅客您好：

由于您/您的被监护人/您的同伴出现了以下一种或多种的症状：发热、咳嗽、呕吐、腹泻、肌肉痛等，检疫人员怀疑您/您的被监护人可能感染了传染病。为了保护您/您的被监护人及他人的身体健康，检疫人员需要从您/您的被监护人身上采集血液等样本进行实验室检测，以排查传染病。

如果您阅读、理解了以上内容，并愿意配合采样工作，请在下方签名以表示同意。

感谢您的合作！

入境旅客已发放就诊方便卡。 旅客姓名：  
日期：

---

Informed consent for sampling

Dear passenger:

Because you/your ward/your accompanier have one or more symptoms as follows: fever, cough, vomit, diarrhea, myalgia and so on, quarantine officials doubt that you/your ward may be infected with some kind of infectious disease. In order to protect your/your ward's and other persons' health, quarantine officials need to take blood or other samples for the related lab tests.

If you understand the above contents and would like to cooperate with quarantine officials in sampling, please sign below.

Thank you for your cooperation!

Name:  
Date:

2013-2-21 第 1 次修订 第 1 页 共 1 页

**Table S1: Infections and their specific laboratory tests recommended by AQSIQ**

AQSIQ=the General Administration of Quality Supervision, Inspection and Quarantine of the People's Republic of China. Travel-related infections are divided into five categories in this study according to the main transmission route of pathogens, including respiratory, gastrointestinal, vector-borne, blood- and sex- transmitted, and mucocutaneous. Respiratory infections indicate those transmitted mainly by droplets, droplet nucleus, dust, or aerosols; gastrointestinal infections indicate those mainly transmitted by patient's excrement (e.g., vomit and feces, etc.); vector-borne infections indicate those mainly transmitted by arthropods (e.g., mosquitoes and chigger, etc.); blood- and sex- transmitted infections indicate those mainly transmitted by blood transfusion or sexual contact; mucocutaneous infections indicate those mainly transmitted by mucous membranes or skin contact.

| Infections*                     | Specific laboratory tests†                       |
|---------------------------------|--------------------------------------------------|
| <b>Respiratory</b>              |                                                  |
| Influenza                       | Real-time RT-PCR                                 |
| Chickenpox                      | Real-time PCR                                    |
| Pneumococcal infection          | Real-time PCR/Isolation and culture              |
| Mumps                           | Real-time PCR/ELISA                              |
| Scarlet fever                   | Colloidal gold method/Isolation and culture      |
| Rubella                         | Real-time RT-PCR/ELISA                           |
| Tuberculosis                    | Real-time PCR/Sputum smear microscope            |
| Measles                         | Real-time RT-PCR                                 |
| Mycoplasma pneumonia            | Real-time PCR                                    |
| Infection with adenovirus       | Real-time RT-PCR                                 |
| Infection with syncytial virus  | Real-time RT-PCR                                 |
| Parainfluenza                   | Real-time RT-PCR                                 |
| Infection with metapneumovirus  | Real-time RT-PCR                                 |
| Infection with rhinovirus       | Real-time RT-PCR                                 |
| Coronavirus infection           | Real-time RT-PCR                                 |
| Other respiratory infections    |                                                  |
| Chlamydia pneumonia             | Real-time PCR                                    |
| <i>legionella pneumophila</i>   | Real-time PCR                                    |
| Bocavirus                       | Real-time RT-PCR                                 |
| <b>Gastrointestinal</b>         |                                                  |
| Bacillary dysentery             | Real-time PCR/Isolation and culture              |
| Typhoid and Paratyphoid         | Real-time PCR/Isolation and culture              |
| Hepatitis A                     | ELISA                                            |
| Amebic dysentery                | Real-time PCR/Isolation and culture/Faeces smear |
| Norovirus infection             | Real-time RT-PCR                                 |
| Cholera                         | Real-time PCR/Isolation and culture              |
| Other infectious diarrhea       |                                                  |
| Rotavirus                       | Real-time RT-PCR                                 |
| <i>Escherichia coli</i> O157:H7 | Real-time PCR/Isolation and culture              |
| Vibrio Parahemolyticus          | Real-time PCR/Isolation and culture              |
| Staphylococcus aureus           | Real-time PCR                                    |
| <b>Vector-borne</b>             |                                                  |
| Malaria                         | Real-time PCR/Colloidal gold method/Slide review |
| Dengue                          | Real-time RT-PCR                                 |
| Chikungunya                     | Real-time RT-PCR                                 |

|                                           |                       |
|-------------------------------------------|-----------------------|
| Scrub typhus                              | Colloidal gold method |
| Zika virus disease                        | Real-time RT-PCR      |
| Rift Valley fever                         | Real-time RT-PCR      |
| Yellow fever                              | Real-time RT-PCR      |
| <b>Blood- and sex-transmitted</b>         |                       |
| Hepatitis B                               | ELISA                 |
| Hepatitis C                               | ELISA                 |
| Syphilis                                  | TRUST/TPPA            |
| HIV infection                             | ELISA/WB/RIBA         |
| Other blood- and sex-transmitted diseases |                       |
| Gonorrhea                                 | Real-time PCR         |
| Papillomavirus infection                  | Real-time PCR         |
| Genital chlamydial infection              | Real-time PCR         |
| <b>Mucocutaneous</b>                      |                       |
| Hand-foot-mouth disease                   | Real-time RT-PCR      |
| Acute conjunctivitis                      | Real-time RT-PCR      |
| Herpes zoster                             | Real-time PCR         |

\*These 23 infectious diseases, including plague, anthrax, Japanese encephalitis, Lassa fever, Middle East respiratory syndrome, Hepatitis E, Meningococcal infection, no-typhoidal Salmonellosis, severe fever with thrombocytopenia syndrome bunyavirus, leptospirosis, filariasis, leishmaniasis, trypanosomiasis, bartonellosis, infectious diarrhea infected with Astrovirus, Calicivirus, Sapovirus, West Nile fever, brucellosis, infection mononucleosis, lymphogranuloma venereum, poliomyelitis and tubercular meningitis were also tested etiologically if necessary at this active surveillance system by using real-time RT-PCR, real-time PCR, ELISA, isolated and culture, slide review, and colloidal gold method. No patients were detected or reported during 2014–16.

†PCR=polymerase chain reaction. RT-PCR=reverse transcription-polymerase chain reaction.  
 ELISA=enzyme-linked immunosorbent assay. TRUST=tolulized red unheated serum test.  
 TPPA=treponema pallidum particle assay. WB=western blot. RIBA=recombinant immunoblot assay.

**Figure S3: The proportion of each specific infection by exposure regions in 2014–16**

Global exposure regions referred to the WHO-designated regions (<http://www.who.int>). ORI=other respiratory infections including chlamydia pneumonia, *legionella pneumophila* or Bocavirus. OID=other infectious diarrhea caused by Rotavirus, *Escherichia coli* O157:H7, *Vibrio Parahemolyticus* or *Staphylococcus aureus*. OBSTD=other blood- and sex-transmitted diseases including gonorrhea, papillomavirus infection or genital chlamydial infection.

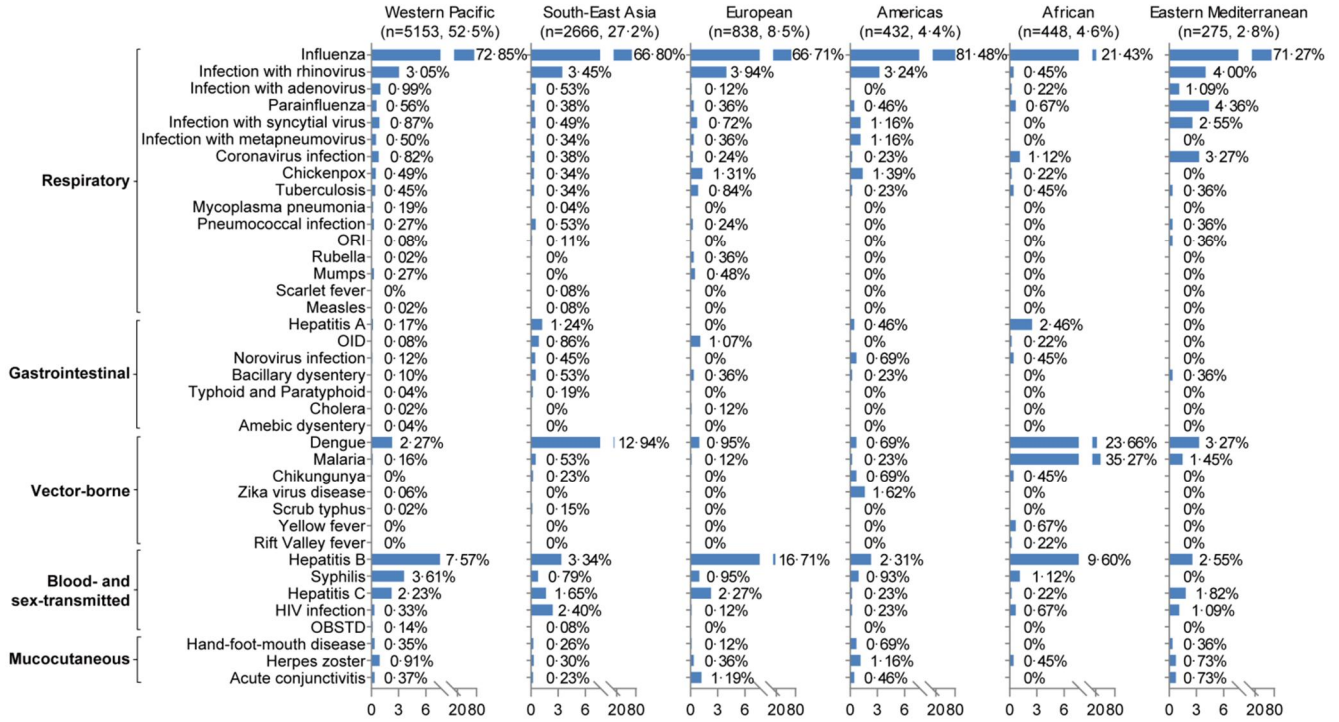



**Figure S4: Seasonal variation of travel-related infections in international and HMT travel groups**  
 RI=respiratory infections. GI=gastrointestinal infections. VBI=vector-borne infections. BSTI=blood- and sex-transmitted infections. MI=mucocutaneous infections.

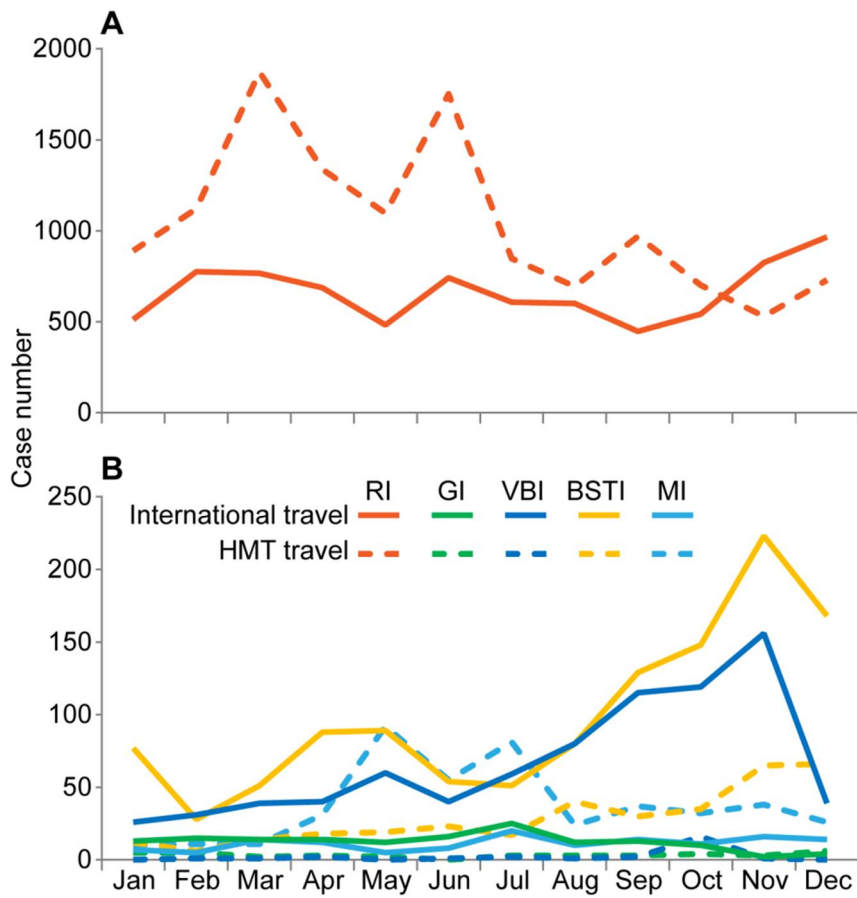

**Table S2: Clinical manifestations of each travel-related infection**

ORI=other respiratory infections including chlamydia pneumonia, *legionella pneumophila* or Bocavirus. OID=other infectious diarrhea caused by Rotavirus, *Escherichia coli* O157:H7, *Vibrio Parahaemolyticus* or *Staphylococcus aureus*. OBSTD=other blood- and sex-transmitted diseases including gonorrhea, papillomavirus infection or genital chlamydial infection.

| Infections                     | No. of cases | Male (%) | Age, median (Range) | Clinical manifestations (%) |        |       |            |       |          |                |          |             |            |              |       |          |
|--------------------------------|--------------|----------|---------------------|-----------------------------|--------|-------|------------|-------|----------|----------------|----------|-------------|------------|--------------|-------|----------|
|                                |              |          |                     | Fever                       | Chills | Cough | Chest pain | Vomit | Diarrhea | Abdominal pain | Headache | Muscle pain | Arthralgia | Flushed face | Rash  | Jaundice |
| <b>Respiratory</b>             | 19662        | 66.8%    | 30 (1-93)           | 84.3%                       | 11.4%  | 47.1% | 0.5%       | 0.6%  | 0.7%     | 0.4%           | 15.8%    | 3.9%        | 2.1%       | 5.8%         | 0.7%  | 0.2%     |
| Influenza                      | 17487        | 66.5%    | 31 (1-93)           | 85.3%                       | 12.0%  | 47.5% | 0.4%       | 0.5%  | 0.6%     | 0.4%           | 16.3%    | 4.2%        | 2.3%       | 5.6%         | 0.3%  | 0.1%     |
| Infection with rhinovirus      | 801          | 67.2%    | 25 (1-84)           | 72.0%                       | 7.6%   | 44.8% | 0.5%       | 1.2%  | 0.9%     | 0.2%           | 16.1%    | 1.6%        | 0.5%       | 8.0%         | 0.1%  | 0.0%     |
| Infection with adenovirus      | 298          | 69.8%    | 4 (1-65)            | 90.6%                       | 5.4%   | 34.6% | 0.3%       | 2.7%  | 2.0%     | 1.0%           | 5.4%     | 0.7%        | 0.0%       | 3.7%         | 0.0%  | 0.0%     |
| Parainfluenza                  | 234          | 69.2%    | 4 (1-66)            | 85.5%                       | 5.1%   | 43.2% | 0.9%       | 1.3%  | 1.7%     | 0.0%           | 5.1%     | 1.3%        | 0.0%       | 3.8%         | 0.0%  | 0.0%     |
| Infection with syncytial virus | 201          | 68.7%    | 4 (1-72)            | 79.6%                       | 5.0%   | 51.2% | 0.5%       | 0.5%  | 1.0%     | 0.0%           | 13.4%    | 0.0%        | 0.0%       | 5.0%         | 0.5%  | 0.5%     |
| Infection with metapneumovirus | 187          | 64.7%    | 4 (1-70)            | 86.6%                       | 3.7%   | 59.4% | 0.0%       | 0.0%  | 0.0%     | 0.0%           | 2.7%     | 1.1%        | 0.5%       | 7.5%         | 0.5%  | 0.5%     |
| Coronavirus infection          | 151          | 76.2%    | 21 (1-83)           | 80.8%                       | 5.3%   | 37.7% | 1.3%       | 0.0%  | 0.7%     | 0.0%           | 15.9%    | 0.7%        | 0.7%       | 10.6%        | 0.7%  | 0.0%     |
| Chickenpox                     | 80           | 71.3%    | 25 (2-60)           | 58.8%                       | 15.0%  | 8.8%  | 1.3%       | 0.0%  | 2.5%     | 1.3%           | 18.8%    | 6.3%        | 3.8%       | 7.5%         | 73.8% | 0.0%     |
| Tuberculosis                   | 50           | 78.0%    | 43 (15-73)          | 30.0%                       | 6.0%   | 64.0% | 20.0%      | 2.0%  | 0.0%     | 18.0%          | 10.0%    | 6.0%        | 0.0%       | 16.0%        | 2.0%  | 6.0%     |
| Mycoplasma pneumonia           | 46           | 63.0%    | 5 (2-73)            | 80.4%                       | 2.2%   | 50.0% | 0.0%       | 0.0%  | 0.0%     | 0.0%           | 2.2%     | 0.0%        | 0.0%       | 4.3%         | 0.0%  | 0.0%     |
| Pneumococcal infection         | 38           | 60.5%    | 45 (3-87)           | 13.2%                       | 15.8%  | 34.2% | 7.9%       | 5.3%  | 2.6%     | 5.3%           | 26.3%    | 2.6%        | 0.0%       | 18.4%        | 5.3%  | 0.0%     |
| ORI*                           | 35           | 68.6%    | 3 (1-41)            | 82.9%                       | 0.0%   | 51.4% | 0.0%       | 2.9%  | 2.9%     | 0.0%           | 0.0%     | 0.0%        | 0.0%       | 2.9%         | 0.0%  | 0.0%     |
| Rubella                        | 22           | 90.9%    | 49 (24-65)          | 13.6%                       | 0.0%   | 4.5%  | 0.0%       | 0.0%  | 0.0%     | 0.0%           | 0.0%     | 0.0%        | 0.0%       | 0.0%         | 86.4% | 4.5%     |
| Mumps                          | 21           | 81.0%    | 10 (3-40)           | 33.3%                       | 23.8%  | 38.1% | 0.0%       | 0.0%  | 4.8%     | 0.0%           | 23.8%    | 19.0%       | 9.5%       | 14.3%        | 4.8%  | 0.0%     |
| Scarlet fever                  | 6            | (4/6)    | 8 (3-66)            | (5/6)                       | (0/6)  | (2/6) | (0/6)      | (0/6) | (0/6)    | (0/6)          | (1/6)    | (0/6)       | (0/6)      | (2/6)        | (3/6) | (0/6)    |
| Measles                        | 5            | (4/5)    | 25 (2-39)           | (4/5)                       | (0/5)  | (1/5) | (0/5)      | (0/5) | (0/5)    | (0/5)          | (0/5)    | (0/5)       | (0/5)      | (0/5)        | (2/5) | (0/5)    |
| <b>Gastrointestinal</b>        | 189          | 61.4%    | 33 (1-72)           | 28.6%                       | 7.9%   | 1.6%  | 0.5%       | 20.6% | 43.9%    | 27.5%          | 4.8%     | 2.1%        | 0.5%       | 3.7%         | 1.1%  | 3.7%     |
| Hepatitis A                    | 55           | 67.3%    | 42 (21-60)          | 1.8%                        | 1.8%   | 0.0%  | 1.8%       | 0.0%  | 0.0%     | 5.5%           | 0.0%     | 0.0%        | 0.0%       | 3.6%         | 0.0%  | 12.7%    |
| OID*                           | 48           | 50.0%    | 35 (1-72)           | 25.0%                       | 12.5%  | 2.1%  | 0.0%       | 29.2% | 68.8%    | 43.8%          | 6.3%     | 2.1%        | 0.0%       | 2.1%         | 0.0%  | 0.0%     |
| Norovirus infection            | 47           | 61.7%    | 27 (1-58)           | 48.9%                       | 6.4%   | 2.1%  | 0.0%       | 36.2% | 51.1%    | 25.5%          | 4.3%     | 2.1%        | 2.1%       | 4.3%         | 0.0%  | 0.0%     |

|                                   |              |              |                  |              |              |              |             |             |             |              |              |              |              |              |              |              |
|-----------------------------------|--------------|--------------|------------------|--------------|--------------|--------------|-------------|-------------|-------------|--------------|--------------|--------------|--------------|--------------|--------------|--------------|
| Bacillary dysentery               | 24           | 70.8%        | 38 (2-58)        | 50.0%        | 16.7%        | 0.0%         | 0.0%        | 20.8%       | 79.2%       | 54.2%        | 12.5%        | 8.3%         | 0.0%         | 8.3%         | 4.2%         | 0.0%         |
| Typhoid and Paratyphoid           | 8            | (5/8)        | 29 (1-57)        | (2/8)        | (0/8)        | (1/8)        | (0/8)       | (1/8)       | (3/8)       | (1/8)        | (1/8)        | (0/8)        | (0/8)        | (0/8)        | (1/8)        | (0/8)        |
| Cholera                           | 5            | (2/5)        | 36 (8-65)        | (4/5)        | (1/5)        | (0/5)        | (0/5)       | (2/5)       | (2/5)       | (1/5)        | (0/5)        | (0/5)        | (0/5)        | (0/5)        | (0/5)        | (0/5)        |
| Amebic dysentery                  | 2            | (2/2)        | 11 (1-21)        | (0/2)        | (0/2)        | (0/2)        | (0/2)       | (0/2)       | (2/2)       | (1/2)        | (0/2)        | (0/2)        | (0/2)        | (0/2)        | (0/2)        | (0/2)        |
| <b>Vector-borne</b>               | <b>831</b>   | <b>79.4%</b> | <b>34 (1-74)</b> | <b>71.0%</b> | <b>26.2%</b> | <b>12.5%</b> | <b>1.2%</b> | <b>6.4%</b> | <b>3.6%</b> | <b>2.4%</b>  | <b>43.6%</b> | <b>24.9%</b> | <b>19.1%</b> | <b>10.6%</b> | <b>5.3%</b>  | <b>1.6%</b>  |
| Dengue                            | 613          | 75.2%        | 32 (1-74)        | 71.9%        | 24.1%        | 13.9%        | 1.1%        | 5.7%        | 3.9%        | 2.6%         | 45.4%        | 27.9%        | 20.4%        | 12.1%        | 6.4%         | 0.5%         |
| Malaria                           | 188          | 92.0%        | 40 (17-69)       | 69.1%        | 34.0%        | 10.1%        | 1.6%        | 8.5%        | 2.7%        | 1.6%         | 37.2%        | 17.6%        | 15.4%        | 5.9%         | 1.1%         | 4.3%         |
| Chikungunya                       | 11           | 100.0%       | 30 (14-54)       | 100.0%       | 36.4%        | 0.0%         | 0.0%        | 0.0%        | 0.0%        | 0.0%         | 36.4%        | 9.1%         | 18.2%        | 9.1%         | 0.0%         | 0.0%         |
| Zika virus disease                | 10           | 80.0%        | 30 (6-40)        | 40.0%        | 0.0%         | 0.0%         | 0.0%        | 0.0%        | 0.0%        | 0.0%         | 50.0%        | 0.0%         | 0.0%         | 0.0%         | 20.0%        | 0.0%         |
| Scrub typhus                      | 5            | (3/5)        | 34 (5-49)        | (3/5)        | (1/5)        | (0/5)        | (0/5)       | (0/5)       | (0/5)       | (0/5)        | (3/5)        | (1/5)        | (1/5)        | (2/5)        | (1/5)        | (0/5)        |
| Yellow fever                      | 3            | (3/3)        | 45 (30-51)       | (1/3)        | (1/3)        | (0/3)        | (0/3)       | (1/3)       | (1/3)       | (1/3)        | (2/3)        | (1/3)        | (1/3)        | (0/3)        | (0/3)        | (1/3)        |
| Rift Valley fever                 | 1            | (1/1)        | 46               | (0/1)        | (0/1)        | (0/1)        | (0/1)       | (1/1)       | (0/1)       | (0/1)        | (0/1)        | (0/1)        | (1/1)        | (0/1)        | (0/1)        | (1/1)        |
| <b>Blood- and sex-transmitted</b> | <b>1531</b>  | <b>78.2%</b> | <b>39 (2-94)</b> | <b>19.0%</b> | <b>2.2%</b>  | <b>10.5%</b> | <b>1.0%</b> | <b>4.1%</b> | <b>3.2%</b> | <b>11.0%</b> | <b>8.7%</b>  | <b>2.6%</b>  | <b>2.5%</b>  | <b>11.3%</b> | <b>3.3%</b>  | <b>20.2%</b> |
| Hepatitis B                       | 943          | 78.3%        | 38 (2-94)        | 15.4%        | 2.0%         | 8.6%         | 1.0%        | 4.8%        | 3.9%        | 13.9%        | 6.3%         | 2.4%         | 1.8%         | 8.1%         | 1.9%         | 24.1%        |
| Syphilis                          | 255          | 78.4%        | 45 (20-79)       | 18.4%        | 0.8%         | 10.6%        | 0.0%        | 0.0%        | 0.8%        | 0.8%         | 8.2%         | 0.4%         | 2.4%         | 18.4%        | 9.4%         | 7.8%         |
| Hepatitis C                       | 230          | 81.3%        | 40 (18-74)       | 29.1%        | 2.6%         | 14.3%        | 1.7%        | 6.5%        | 2.2%        | 13.5%        | 16.1%        | 4.8%         | 6.1%         | 16.5%        | 2.6%         | 26.5%        |
| HIV infection                     | 94           | 71.3%        | 36 (10-68)       | 33.0%        | 6.4%         | 20.2%        | 3.2%        | 3.2%        | 5.3%        | 3.2%         | 17.0%        | 5.3%         | 2.1%         | 11.7%        | 2.1%         | 1.1%         |
| OBSTD*                            | 9            | (6/9)        | 25 (23-43)       | (1/9)        | (0/9)        | (1/9)        | (0/9)       | (0/9)       | (0/9)       | (2/9)        | (0/9)        | (0/9)        | (0/9)        | (1/9)        | (1/9)        | (1/9)        |
| <b>Mucocutaneous</b>              | <b>584</b>   | <b>75.2%</b> | <b>5 (1-75)</b>  | <b>70.5%</b> | <b>2.6%</b>  | <b>18.2%</b> | <b>1.0%</b> | <b>0.5%</b> | <b>0.3%</b> | <b>0.0%</b>  | <b>4.3%</b>  | <b>0.7%</b>  | <b>0.2%</b>  | <b>4.1%</b>  | <b>11.0%</b> | <b>0.3%</b>  |
| Hand-foot-mouth disease           | 406          | 70.7%        | 4 (1-61)         | 92.9%        | 1.2%         | 19.7%        | 0.2%        | 0.5%        | 0.5%        | 0.0%         | 2.2%         | 0.0%         | 0.0%         | 2.0%         | 2.2%         | 0.2%         |
| Herpes zoster                     | 103          | 85.4%        | 37 (1-71)        | 31.1%        | 7.8%         | 20.4%        | 4.9%        | 1.0%        | 0.0%        | 0.0%         | 12.6%        | 3.9%         | 1.0%         | 14.6%        | 53.4%        | 1.0%         |
| Acute conjunctivitis              | 75           | 85.3%        | 38 (5-75)        | 4.0%         | 2.7%         | 6.7%         | 0.0%        | 0.0%        | 0.0%        | 0.0%         | 4.0%         | 0.0%         | 0.0%         | 1.3%         | 0.0%         | 0.0%         |
| <b>Total</b>                      | <b>22797</b> | <b>68.2%</b> | <b>30 (1-94)</b> | <b>78.6%</b> | <b>11.1%</b> | <b>42.2%</b> | <b>0.5%</b> | <b>1.2%</b> | <b>1.3%</b> | <b>1.4%</b>  | <b>15.9%</b> | <b>4.5%</b>  | <b>2.7%</b>  | <b>6.2%</b>  | <b>1.3%</b>  | <b>1.6%</b>  |
